# Supplementary material for: The Evolution of Rag Gene Enhancers and Transcription Factor E and Id Proteins in the Adaptive Immune System
Source: MDPI journal article supplement (doi:10.3390/ijms22115888), 2021-05-31
Supplement: s1 [file s1]

Figure S1

(A)

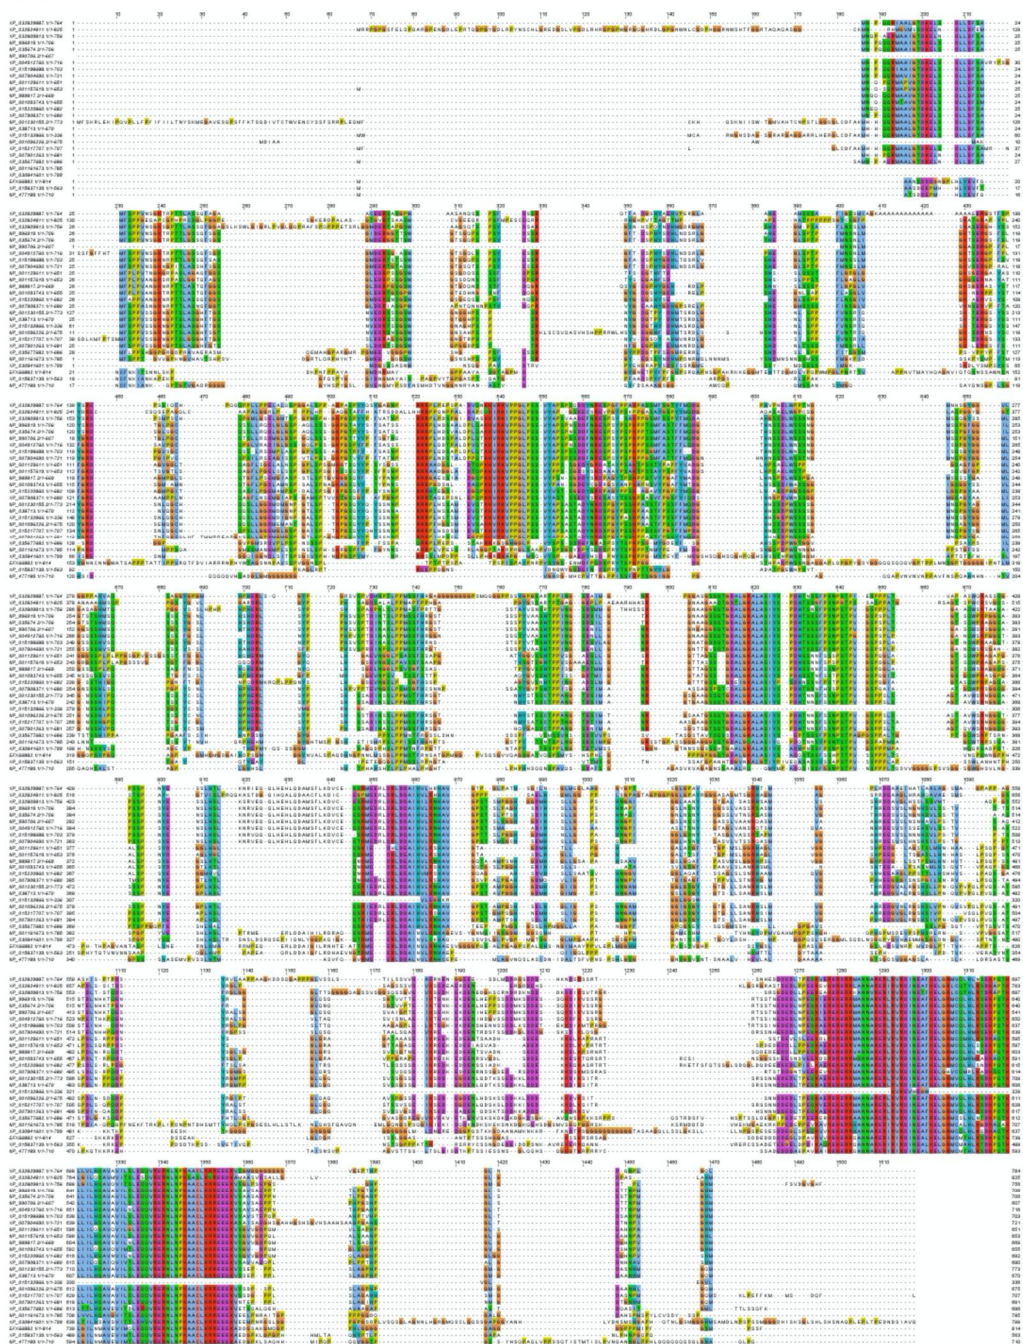



Figure S1

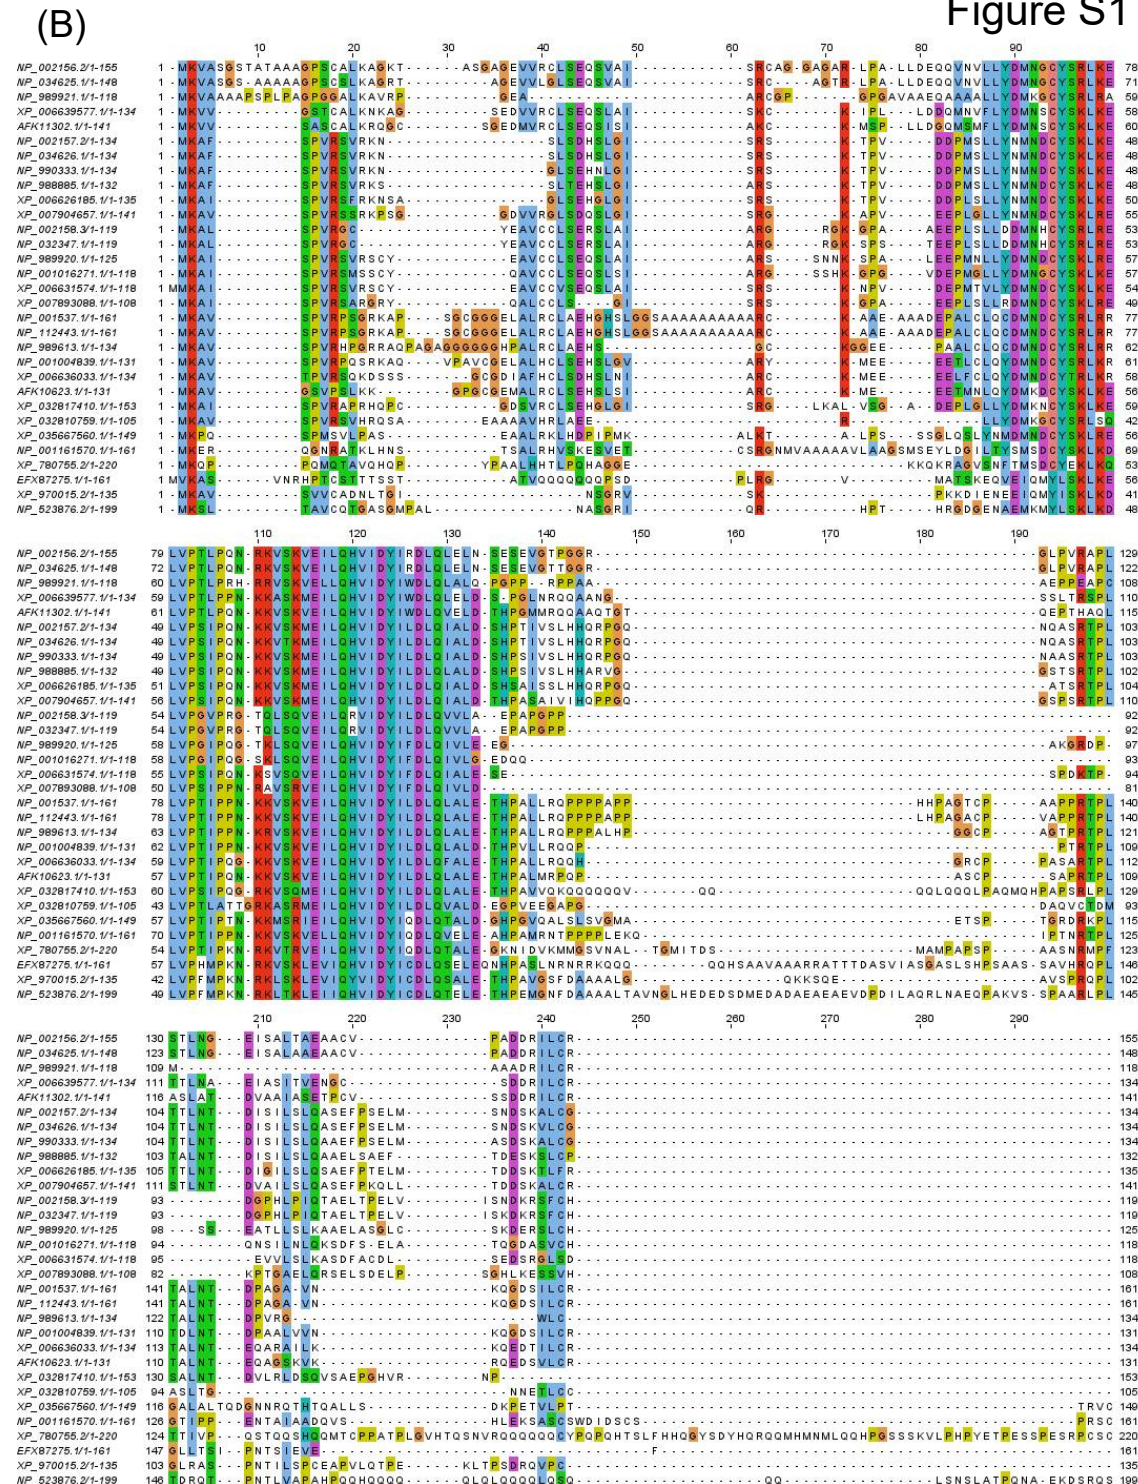

**Figure S1.** Multiple sequence alignments of E proteins (A) and Id proteins (B). The alignments were visualized using Jalview (version 2.11.1.4) [1].

1. Waterhouse, A. M.; Procter, J. B.; Martin, D. M.; Clamp, M.; Barton, G. J. Jalview Version 2 - a multiple sequence alignment editor and analysis workbench. *Bioinformatics* **2009**, 25(9), p. 1189-1191.
